# Supplementary material for: Genetic Variation and Composition of Two Commercial Estonian Dairy Cattle Breeds Assessed by SNP Data
Source: MDPI journal article supplement (doi:10.3390/ani14071101), 2024-04-04
Supplement: s1 [file s1]

## Supplementary information

**Table S1.** Genomic inbreeding coefficients ( $F_{\text{HOM}}$  and  $F_{\text{ROH}}$ ) by sire-origin groups in Estonian Holstein and in Estonian Red breed.

| Sire origin *     | Group size  | F <sub>HOM</sub> |               | F <sub>ROH</sub> |               |
|-------------------|-------------|------------------|---------------|------------------|---------------|
|                   |             | Mean             | Sd            | Mean             | Sd            |
| Estonian Holstein |             |                  |               |                  |               |
| CAN               | 126         | -0.0059          | 0.0302        | 0.1172           | 0.0263        |
| CHE               | 33          | -0.0167          | 0.0368        | 0.1040           | 0.0333        |
| DEU               | 566         | -0.0092          | 0.0291        | 0.1132           | 0.0263        |
| DSF               | 260         | -0.0082          | 0.0317        | 0.114            | 0.0276        |
| inc. DNK          | 244         | -0.0101          | 0.0308        | 0.1123           | 0.0266        |
| FIN               | 11          | 0.0188           | 0.0367        | 0.1393           | 0.0281        |
| SWE               | 5           | 0.0234           | 0.0263        | 0.1455           | 0.0343        |
| EST               | 99          | -0.0169          | 0.0247        | 0.1046           | 0.0210        |
| FRA               | 21          | -0.0132          | 0.0247        | 0.1168           | 0.0231        |
| GBR               | 15          | -0.0210          | 0.0164        | 0.1011           | 0.0113        |
| NLD               | 488         | -0.0105          | 0.0300        | 0.1110           | 0.0265        |
| USA               | 653         | 0.0029           | 0.0298        | 0.1235           | 0.0265        |
| <b>Total</b>      | <b>2265</b> | <b>-0.0063</b>   | <b>0.030</b>  | <b>0.1155</b>    | <b>0.0269</b> |
| Estonian Red      |             |                  |               |                  |               |
| DNK               | 89          | -0.0135          | 0.0288        | 0.0428           | 0.0241        |
| EST               | 32          | -0.0173          | 0.0271        | 0.0432           | 0.0232        |
| FIN               | 77          | -0.0112          | 0.0345        | 0.0438           | 0.0289        |
| SWE               | 18          | -0.0050          | 0.0189        | 0.0474           | 0.0162        |
| <b>Total</b>      | <b>215</b>  | <b>-0.013</b>    | <b>0.0303</b> | <b>0.0438</b>    | <b>0.0252</b> |

\*CAN – Canada, CHE – Switzerland, DEU – Germany, DFS – Denmark, Finland, Sweden, DNK – Denmark, EST – Estonia, FIN – Finland, FRA – France, GBR – Great Britain, NLD – Netherlands, SWE – Sweden, USA – United States of America.
